# Supplementary material for: Synthesis of a novel glycerol based B3-type monomer and its application in hyperbranched polyester urethane–urea coatings
Source: Royal Society of Chemistry journal article supplement (doi:10.1039/c5ra11712g), 2015-01-01

## Synthesis of novel glycerol based B<sub>3</sub>-type monomer and its application in Hyperbranched polyester urethane-urea coatings

Somisetti Varaprasad, Shaik Allauddin, Ramanuj Narayan and KVSN Raju\*

*Polymers & Functional Materials Division, Indian Institute of Chemical Technology, Hyderabad-500007, India*

---

Table 1S. Solubility data of HBP

| SOLVENTS               | HBP |
|------------------------|-----|
| Methyl isobutyl ketone | -   |
| Methyl ethyl ketone    | +   |
| Xylene                 | -   |
| Toluene                | -   |
| Tetrahydrofuran        | +   |
| Chloroform             | -   |
| Diethylether           | +   |
| Water                  | +   |
| 1,4-dioxane            | +   |
| Dimethyl formamide     | +   |
| N-methyl pyrrolidone   | +   |
| DMSO                   | +   |
| DCM                    | -   |
| Ethyl acetate          | -   |
| Iso propyl alcohol     | +   |

---

“+” indicates “soluble” and “-” indicates “insoluble”

\* DMSO - Dimethyl sulphoxide

\*\* DCM - Dichloro methane

Figure 1S. DSC curves of B<sub>3</sub> and HBP

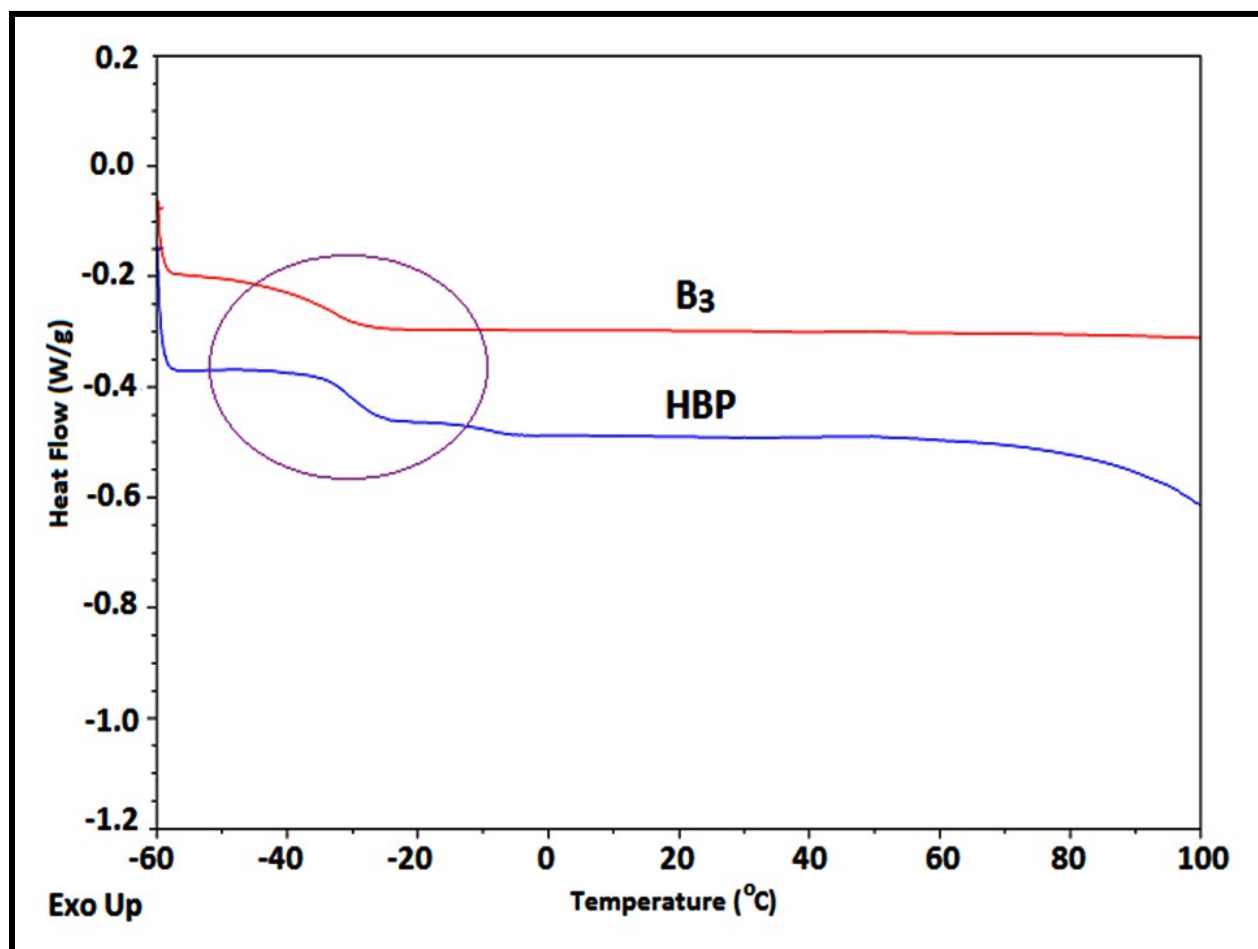

Figure 2S. FTIR Spectra of PU films

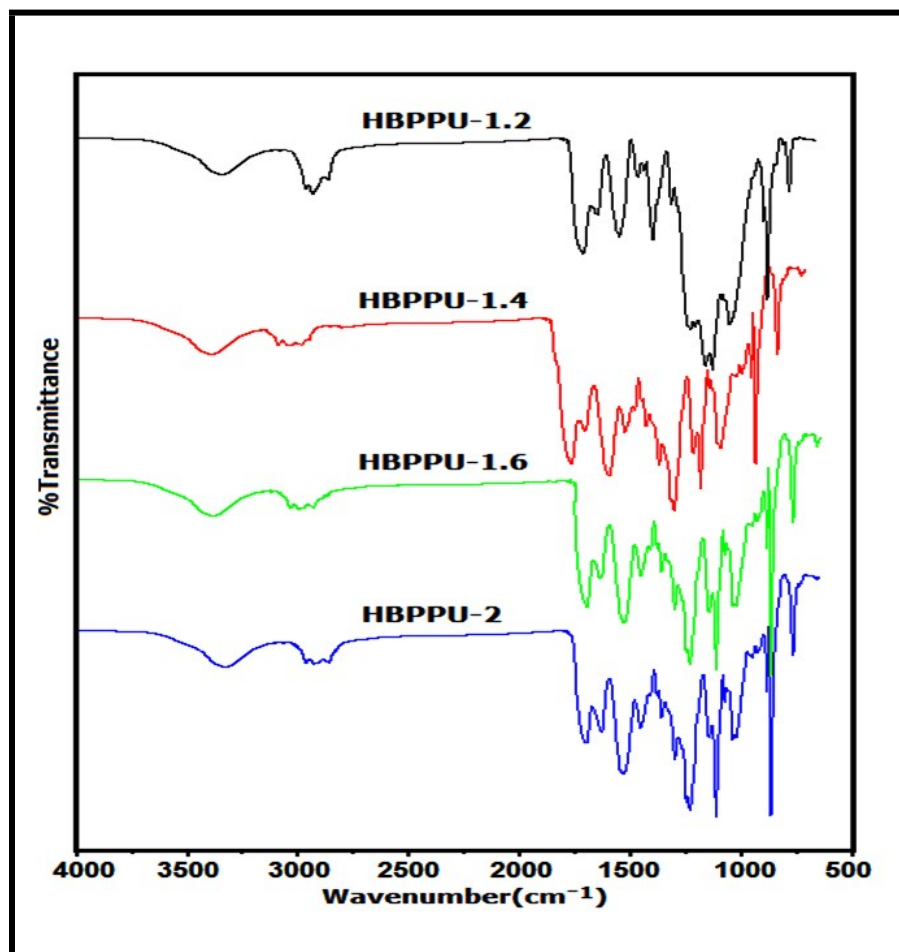

Supplement: c5ra11712g1.pdf [file c5ra11712g1.pdf]
